# Supplementary material for: Genetic diversity assessed by genotyping by sequencing (GBS) and for phenological traits in blueberry cultivars
Source: PLOS journal article supplement (doi:10.1371/journal.pone.0206361), 2018-10-23

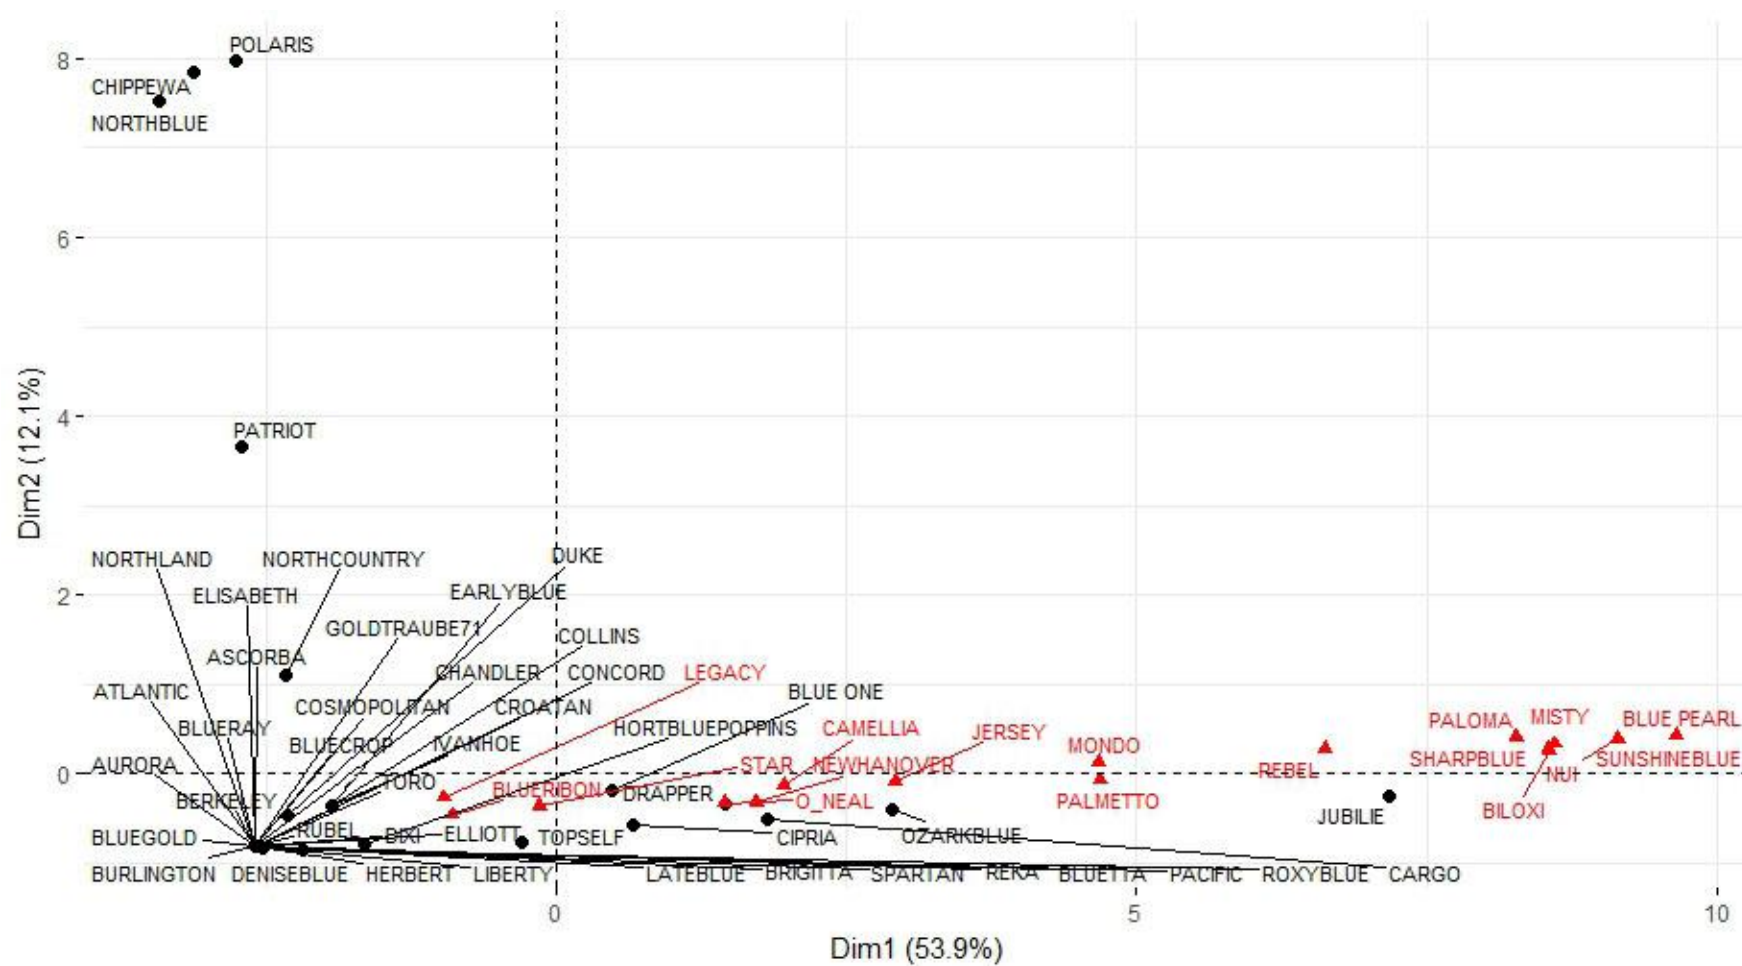

Supplement: S1 (10.1371/journal.pone.0206361.s001) [file journal.pone.0206361.s001]
